# Supplementary material for: Induction of Apoptosis, Inhibition of MCL-1, and VEGF-A Expression Are Associated with the Anti-Cancer Efficacy of Magnolol Combined with Regorafenib in Hepatocellular Carcinoma
Source: MDPI journal article supplement (doi:10.3390/cancers13092066), 2021-04-25
Supplement: s1 [file s1]

# Supplementary Material: Induction of Apoptosis, Inhibition of MCL-1, and VEGF-A Expression Are Associated with the Anti-Cancer Efficacy of Magnolol Combined with Regorafenib in Hepatocellular Carcinoma

Cheng-Hsien Chen, Fei-Ting Hsu, Wei-Lung Chen and Jiann-Hwa Chen

Full blot images of Hep3B Figure 1G

supplementary figure 1

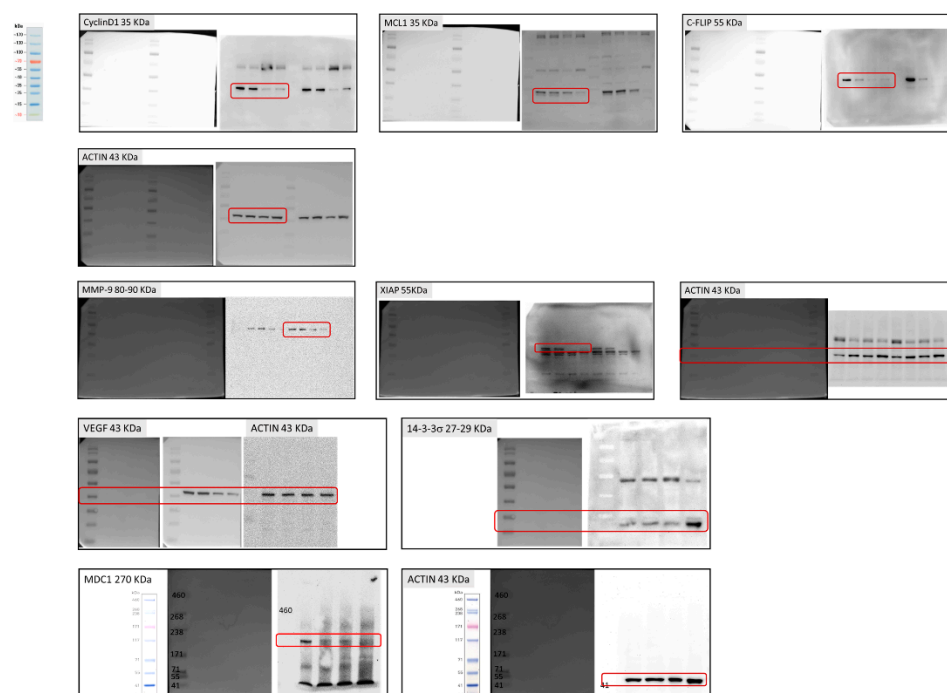

Full blot images of SK-Hep1 Figure 1H

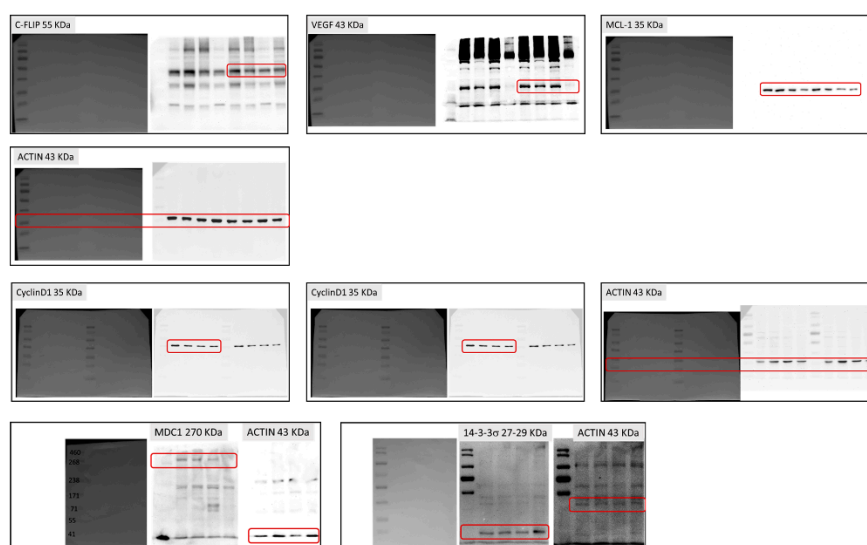

Figure S1. Full Western blot images of Figure 1G,H.

### Full blot images of Hep3B and SK-Hep1 Figure 2G-J

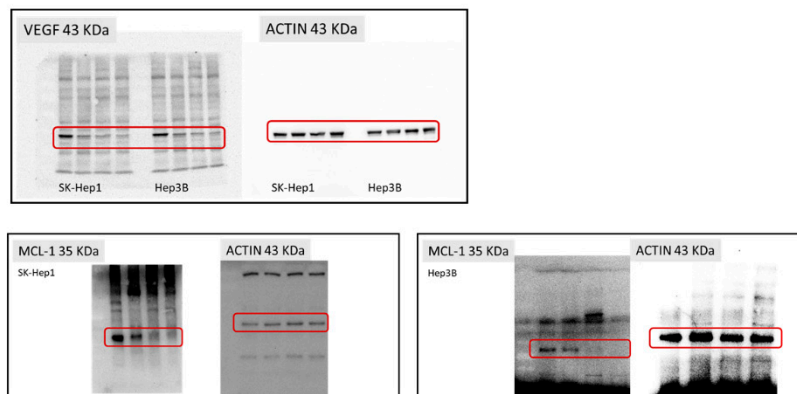

### Full blot images of Hep3B and SK-Hep1 Figure 5H-I

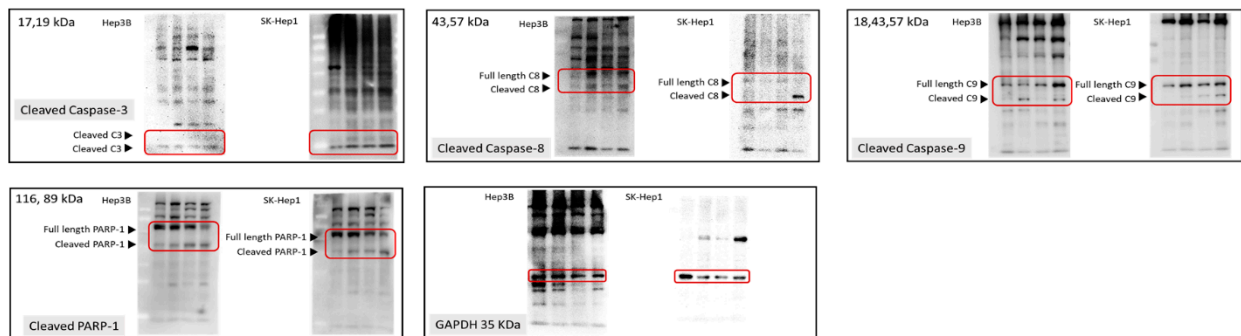

**Figure S2.** Full Western blot images of Figures 2G,J, 5H,I.
